# Supplementary material for: Liver stiffness and serum galectin 3 level significantly increases in patients with prediabetes: a fibroscan study
Source: PeerJ. 2025 Apr 23;13:e19377. doi: 10.7717/peerj.19377 (PMC12032955; doi:10.7717/peerj.19377)
Supplement: Supplemental Information 2 [file peerj-13-19377-s002.xlsx]

## Sheet: 4
Group	Gender	Hypertension	Smoking	BMI	Waist circumference	Systolic blood pressure	Diastolic blood pressure	Basal heart rate	HbA1c	Glucose	CRP	WBC	RBC	Hemoglobin	Urea	Creatinine	Sodium	Potassium	Calcium	Albumin	Age	ALT	AST	Platelet	Fib-4	Kpa	group kpa	galectin 3	Triglycerides	HDL	LDL	Cholesterol	TSH	Liver size	Liver steatosis grade
group 1	male	no	no	22.7	88	110	60	62	5	88	1.3	9300	4.97	14.3	19	0.69	143	4.55	9.7	47	62	27	17	282	0.28	5.13	0	9.3	70	38	121	187	1.1	12.5	no
group 1	female	no	no	30.1	91	110	60	78	5.6	92		4500	5	14.5	29	0.67	139	4.5	8.8	45	63	28	17	288	0.27	4.94	0	11.1	155	47	107	167	0.9	11	no
group 1	female	no	no	25.7	92			78	6	99	0.2	8500	4.11	12.8	27	0.83	139	4.3	8.8	47	60	27	17	282	0.27	4.94	0	11.1	52	60	104	177	2.07	11	no
group 1	female	no	no	23.4	89	120	60	62	6	83		5100	4.26	7.9	17	0.57	139	4.26	9.7	36	64	28	17	290	0.27	5.13	0	11.1	124	30	84	133		12.5	no
group 1	female	no	no	22.3	90	110	60	82	5.9	87		5600	4.11	11	17	0.5	139	4.7	8.8	45	49	24	18	271	0.27	4.94	0	11.1	114	57	107	167	1.55	11	no
group 1	female	no	no	22.3	94	110	60	78	5	91	0.7	4000	4.5	12.5	20	0.66	134	4.3	9.02	42	50	25	18	274	0.26	4.78	0	7	64	45	91	141	0.77	11	no
group 1	male	no	no	23.4	90	120	60	84	6.25	93	0.7	9300	4.9	15.4	29	0.78	136	4.5	9.02	47	61	28	17	285	0.26	4.78	0	6.1	70	50	107	167	5.36	11	no
group 1	female	no	no	22	92	120	60	82	5.6	74	2.3	8500	5.2	14.2	22	0.76	141	4.4	9.5	45	62	29	17	292	0.25	4.63	0	10	79	69	95	171	1.7	13	no
group 1	male	no	no	22	90			78	4.5	86	2	8500	5.08	12.5	20	0.52	140	4.7	9.7	41	59	28	17	285	0.25	5.13	0	9.3	143	69	107	167	0.84	12.5	no
group 1	female	no	no	22	81	120	60	84	5.9	81	0.7	5800	5	14.6	16	0.71	139	4.3	8.8	41	67	21	14	370	0.24	2.34	0	9.4	52	54	92	155	1.31	12	no
group 1	female	no	no	22	94	110	60	80	6	81	0.8	5600	4.86	8.1	22	0.76	139	4	9.5	37	55	27	17	284	0.24	4.63	0	6	147	45	107	211	1.44	13	no
group 1	male	no	no	29	93	120	60	62	5.6	87		8500	4.5	12.6	27	0.61	140	4.7	9.02	44	54	28	17	285	0.23	3.48	0	9.4	72	53	112	181		14	no
group 1	female	no	no	22	88	120	70	80	5.9	73	0.8	6400	4.4	11	27	0.62	138	4.6	9.02	38	47	25	17	278	0.23	3.48	0	8.2	296	41	123	189	1.31	14	no
group 1	male	no	no	22	93	120	60	82	6	87	2.3	5000	4.2	12	16	0.6	138	4.7	8.8	43	52	22	15	313	0.23	3.64	0	7	126	48	130	195	1.69	11	no
group 1	female	no	no	22	90			62	4.5	75	1.3	8500	4.6	13	19	0.87	138	4.5	9.02	45	64	30	16	296	0.23	4.78	0	7	165	59	107	182	3.6	11	no
group 1	female	no	no	22	91			62	6	95	1.3	4400	4.4	13.6	18	0.98	142	5.7	8.8	40	66	23	14	360	0.22	2.34	0	9.3	81	71	153	167	1.44	12	no
group 1	male	no	no	22	93	120	60	84	5	89		8500	5.24	13.3	22	0.73	138	4.9	8.8	43	60	30	16	294	0.22	4.18	0	9	58	60	104	171	0.97	12	no
group 1	female	no	no	22	92			82	6	67		9300	4.8	13.4	20	0.52	141	4.3	9.02	41	64	31	16	301	0.22	3.48	0	8.1	79	60	123	201	1.14	14	no
group 1	male	no	no	22.3	88	110	60	82	5.9	90	0.8	9300	5.1	14.8	22	1	131	4.7	9.5	45	58	29	16	294	0.22	4.63	0	6.1	70	60	139	167	1.31	13	no
group 1	male	no	no	23.4	88	110	60	80	5.9	83	0.8	9300	4.56	13.5	19	0.46	138	4.17	8.8	38	52	29	17	290	0.21	3.64	0	11	129	51	107	167	3.6	11	no
group 1	male	no	no	22	81	120	70	78	4.5	96		8500	4.6	12.8	19	0.6	139	4.4		43	70	32	15	319	0.21	3.64	0	9	85	43	110	169		12.5	no
group 1	female	no	no	22	93	120	60	62	5	98		5900	4.6	13	21	0.7	131	5		38	72	32	15	314	0.21	3.18	0	8	132	58	107	167		12	no
group 1	male	no	no	22.3	89	120	70	84	6	93	1.3	8500	4.59	15.7	29	1	141	4.26		43	65	32	16	303	0.21	3.18	0	6.1	70	40	124	167	1.44	12	no
group 1	male	no	no	22.3	90	120	60	78	5.6	92		8500	5	14.3	28	0.94	139	4.33	8.41	42	61	32	16	303	0.2	3.86	0	11	99	55	107	167	0.7	12	no
group 1	male	no	no	34.2	89	120	70	80	5.9	81	0.8	9300	5	13.4	27	0.56	135	4.2	8.41	40	70	32	15	327	0.2	3.86	0	9.3	200	55	160	167	5.36	12	no
group 1	female	no	no	23.4	90	120	60	82	6	78		8500	4.33	12.4	21	0.68	139	4.2	8.41	42	60	32	16	306	0.2	3.86	0	8	160	53	99	164	0.77	12	no
group 1	female	no	no	23.4	91	120	70	78	4.5	79	2	4500	4.8	13.2	22	0.69	142	4.3	8.8	41	64	32	15	314	0.19	4.18	0	10	93	63	107	167		12	no
group 1	male	no	no	22.3	90	120	60	62	6	93		5400	4.9	14.8	28	0.79	138	4	9.3	45	56	23	14	357	0.19	2.31	0	9.3	125	57	144	167		13	no
group 1	female	no	no	29.2	89	110	60	84	4.5	70	0.7	6400	4.5	12.2	12	0.77	141	4.66	8.41	43	51	26	15	310	0.19	2.86	0	8.2	70	47	104	162	1.14	12	no
group 1	male	no	no	25	90	120	70	78	5	83	0.2	8500	4.96	14.3	25	0.66	140	4.4	8.41	45	50	26	15	311	0.19	2.86	0	8	72	47	131	212	2.15	12	no
group 1	female	no	no	33.8	93	110	60	84	5.9	96	0.7	9300	4.8	12.3	24	0.5	136	4.7	9.9	42	43	27	17	284	0.19	2.98	0	8	70	53	107	167	0.77	15	no
group 1	female	no	no	23.4	93	120	70	62	5.9	98	1.3	8500	5.2	15.2	25	0.56	131	4.3	9.5	45	68	26	14	384	0.19	2.26	0	7	124	55	107	167	1.69	13	no
group 1	female	no	no	28	81			84	5.6	88		9300	4.4	13.7	19	0.44	131	4.5	9.5	42	65	24	13	397	0.18	2.26	0	11.1	126	66	107	167	3.6	13	no
group 1	male	no	no	22	91	120	70	62	4.5	91	1.3	9300	4.9	12	32	1.1	136	4.1		42	68	32	14	329	0.18	3.18	0	8.1	162	54	107	234	1.7	12	no
group 1	male	no	no	22.3	81			78	6	76	0.2	8500	5	15	31	0.84	131	4.3	9.9	40	64	32	15	327	0.18	2.98	0	8	118	53	107	167	2.07	15	no
group 1	male	no	no	28.3	93			62	6	79		8500	5.4	16	22	0.87	140	4.7	8.8	42	60	32	15	312	0.18	4.18	0	6	153	46	107	167	0.84	12	no
group 1	female	no	no	31.6	88			78	5.6	89	0.2	6400	4.6	12.1	31	0.59	141	4.8	9.9	46	47	30	16	300	0.17	2.98	0	11.5	70	50	107	304	0.7	15	no
group 1	male	no	no	22	93	120	70	78	4.5	80	2	9300	4.8	13.7	22	0.47	139	4.1	9.3	43	58	26	14	369	0.17	2.31	0	11.1	70	52	146	167	0.9	13	no
group 1	male	no	no	33.1	94			78	5.6	94		6600	4.4	11	30	0.84	139	4.8	8.8	38	50	25	14	338	0.17	2.34	0	11.1	70	67	107	262		12	no
group 1	male	no	no	27.4	93	120	60	62	5	95		5300	4.8	15.5	34	0.86	140	4.8	9.3	42	51	25	14	330	0.17	2.31	0	11.1	70	60	107	167	1.55	13	no
group 1	female	no	no	24.4	92	120	70	78	5	92	2	9300	5	12.5	22	0.85	131	4.7	9.6	44	45	22	14	336	0.17	3.61	0	7.5	92	50	107	175	2.07	13	no
group 1	male	no	no	27.5	91			82	6	87		9300	4.5	13.5	16	0.72	138	4.7	8.41	43	58	32	15	321	0.17	2.86	0	7.5	110	52	111	174		12	no
group 1	female	no	no	22	91			82	5	82	2.3	6200	4.9	9.2	20	0.49	140	4.28	9.7	41	70	27	13	404	0.17	1.77	0	6.1	63	47	68	117		12	no
group 1	male	no	no	22	92	110	60	62	6	87		4100	4.6	12	14	0.59	138	4.7	9.5	40	55	25	14	366	0.17	2.26	0	6.1	98	37	94	145	1.1	13	no
group 1	male	no	no	23.4				82	5.6	95	2.3	9300	5	14.5	19	0.71	140	4.28		42	46	30	16	300	0.16	3.64	0	11.5	131	38	128	183	1.1	12.5	no
group 1	male	no	no	26.8	92	120	60	80	6	90	0.8	5900	4.5	14.8	27	0.88	140	4.25		43	60	32	14	335	0.16	3.64	0	9.3	162	57	107	167	1.69	12.5	no
group 1	male	no	no	22.3	81			80	4.5	74	2.3	8500	5.17	14.9	32	0.67	131	4.52	9.7	45	58	27	14	387	0.16	1.77	0	7	70	32	107	172	1.7	12	no
group 1	male	no	no	22	81	110	60	78	6	98		9300	5.9	11	24	0.56	142	4	9.7	43	57	27	14	370	0.16	1.77	0	6	97	47	128	167	1.55	12	no
group 1	male	no	no	22.3	93	120	70	62	6	98	2	8500	5	16	28	1	132	4	9.6	46	65	32	14	345	0.16	3.61	0	6	70	39	107	167	0.9	13	no
group 1	female	no	no	26.6	93	120	60	78	5.9	78		6000	4.2	10.2	23	0.58	139	4.2	9.6	41	51	25	14	372	0.15	1.76	0	10	70	48	107	167		12	no
group 1	female	no	no	29.7	90	120	60	82	4.5	95		9300	4.68	12.4	29	0.79	142	4.44	9.6	39	59	28	14	390	0.15	3.61	0	10	189	37	115	169	0.7	13	no
group 1	female	no	no	22.3	94	120	70	82	5	91		5700	4.6	14	21	0.6	139	4.3	8.8	37	54	28	14	371	0.15	3.64	0	8	70	46	107	231	5.36	11	no
group 1	female	no	no	28.4	90	110	60	78		98	2	8500	4.5	13.3	26	0.49	142	4.6	9.9	40	65	25	11	452	0.13	1.16	0	9	122	65	107	167	0.97	13	no
group 1	male	no	no	22	88	120	70	62	6	98		4600	4.54	12.5	30	0.61	139	4.2	9.9	43	47	28	14	374	0.13	1.16	0	8	70	55	133	212	1.14	13	no
group 1	female	no	no	25.6	90			78	6	88	0.2	4000	4.08	12.6	39	0.65	141	4.98	9.6	46	57	28	13	408	0.13	1.76	0	6	91	77	107	167	0.97	12	no
group 1	male	no	no	29.7	93	120	70	82		84	2.3	5500	4.9	14.3	40	0.87	138	4	9.3	39	56	27	12	419	0.12	1.13	0	9.3	103	55	139	211		11	no
group 1	male	no	no	22	94	110	60	80	5.6	99	0.7	9300	4.59	13.2	22	0.71	141	4.8	9.6	42	51	29	13	408	0.11	1.76	0	10	134	60	80	146	2.15	12	no
group 1	female	no	no	26.9	89	120	60	82		96		5500	4	12.9	21	0.64	143	4.88	9.9	38	57	28	11	437	0.1	1.16	0	11	70	61	107	167	2.15	13	no
group 1	female	no	no	23.4	89	110	60	78		92		6100	4.5	13	41	0.71	138	4.3	9.3	41	60	30	11	431	0.1	1.13	0	8	141	59	107	167	0.84	11	no
group 1	male	no	no	22	94	120	60	78		98	0.2	8500	5	15	22	0.81	141	4.5	9.3	42	64	31	10	476	0.09	1.13	0	9.3	86	46	112	173		11	no
group 2	male	no	no	28.1	99	120	60	80	6.2	117	2.5	7600	5.75	17.1	35	0.72	136	4.71	9.3	44	58	17	23	228	0.69	6.98	0	9.4	133	52	124	203	0.93	14.6	grade 2-3
group 2	male	no	no	32.4	95	120	60	82	6.2	126	1	8700	4.53	12.9	35	1	138	4.48	9		50	16	24	222	0.68	4.19	0	14	131		197		1.14	14	grade 1
group 2	male	no	yes	28.7	95	120	60	78	6.5	117		8900	5.3	16.1	25	0.84	138	4.77		38	50	16	24	222	0.68	7.57	0	8	425	28	131	209	0.84	13	grade 1
group 2	female	yes	no	35	103	130	70	84	6.5	114	1	8900	4.34	12.6	56	1.04	133	5.7	9.7	38	48	16	24	218	0.66	5.21	0	14	458	31	258	380	1.68	17	grade 1
group 2	female	no	no	32.4	104	120	70	62	6	117	0.9	6400	4.16	12.3	28	1	139	4.42	8.8	42.4	71	19	21	246	0.64	6.6	0	14	177	55	124	194		14	no
group 2	female	yes	no	29	102				6.5	117	1	8900	3.1	13.5	30	0.73	127	4.63	8.5	39.5	62	18	22	236	0.64	5.25	0	11	125	30	88	161	1.22	14	grade 1
group 2	female	no	no	27.6	95	120	60	78	6.3	117	1	5600	4.34	12.6	35	0.52	142	4.8	10.3	42	66	19	22	237	0.64	2.79	0	11	150	58	122	176	0.97	15	grade 1
group 2	male	y	no	32	98	110	60	72	6.6	117		6600	4.06	13.5	30	0.63	138	4.18		40.2	60	18	22	234	0.63	6.97	0	10	89	49	117	186	0.9	17	grade 1
group 2	male	no		35.2	90	120	80	62	6.5	117	1.3	7300	4.09	12.2	43	0.83	135	3.99	9.1	43	60	18	22	234	0.63	6.6	0	14	335	29	114	167	2.07	14	no
group 2	male	no	no	38.6	96				6.2	117	0.8	8600	5.2	14.5	21	1	137	4.24	9.5	39	60	18	22	233	0.63	6.6	0	13	355	42	152	230	1.2	14	no
group 2	female	yes	no	31.2	97				6.3	117	2.1	6600	4.53	12.7	21	0.62	140	4.48	9.3	41	60	18	22	234	0.63	7.16	0	8	89	32	96	174	0.7	15	grade 1
group 2	female	no	no	27.5	90	120	70	66	6.5	117	2.3	6300	4.29	11.2	29	1	136	3.8	8.8	33	66	27	21	253	0.41	7.16	0	8.2	329	38	97	159	0.37	15	grade 1
group 2	male	no	yes	29.3	97	120	80	84	6.5	117	0.7	8800	5.46	13.5	26	0.61	134	3.54	8.16	38	62	28	21	240	0.39	6.98	0	6	116	42	124	199	0.66	14.6	grade 2-3
group 2	female	no		29.7	104	130	80	64	5.5	80.4	1.65	6000	4.32	13	32	0.82	137	4.2	8.9	47	69	27	20	260	0.39	7.97	0	8.1	167	54	97	191	1.96	19	grade 1
group 2	male	no	yes	28	102				6.2	117	1.3	8800	5.4	14.9	28	0.77	138	4.7	9		59	28	21	242	0.37	7.57	0	8	71	47	77	119	0.9	13	grade 1
group 2	male	no	yes	30.1	96				6.2	117	1	8900	5.2	16.2	25	0.62	137	4.8	10.1	31	62	32	22	236	0.36	6.97	0	17	146	36	119	190	2.1	17	grade 1
group 2	female	no	yes	29.5	98	120	70	66	6.5	117		6200	4.72	11.4	35	0.75	140	4.35			69	27	18	272	0.34	6.97	0	16	136	32	166	267	1.28	17	grade 1
group 2	female	no	no	33.5	97	120	60	84	6.5	117	1	7900	4.19	12.6	28	0.71	136	4.06	9.6	43	60	27	20	258	0.34	7.97	0	10	146	36	70	120	5.36	19	grade 1
group 2	male	no	yes	32	103	120	70	66	6	101	2.3	8700	4.34	11.9	35	0.58	131	4.43	9	45	54	23	19	270	0.33	2.63	0	21	258	46	104	164	1.02	15	grade 1
group 2	male	no	yes	25.9	97	110	60	70	6.2	117	1.8	5500	4.41	13.2	18	0.76	142	4	9.1	40	54	27	21	257	0.33	3.42	0	12.5	206	43	186	261	3.73	19	no
group 2	female	no	yes	29.4	100	110	60	70	6.5	117		8000	4.87	14.9	18	1	138	4.38	9.9	46	58	27	20	258	0.33	7.78	0	6.1	469	51	161	255	1.17	15.5	grade 1
group 2	female	yes	yes	28	102				5.6	96	4.7	6500	4.19	11.3	41	0.62	138	4.87	9.2	38.8	69	26	17	281	0.32	2.63	0	21	145	45	71	125	1.31	15	grade 1
group 2	male	no	no	30	97				6.2	117		8700	5.19	13.2	35	0.66	137	3.35			66	27	18	276	0.32	3.84	0	16.7	164	45	90	140	1.44	15.5	no
group 2	male	0	yes	36.3	99	120	80	78	5.9	117	1	7500	4.21	13	30	0.81	138	3.74	9.6	47	67	26	17	282	0.31	2.64	0	24	139	38	104	158	1.23	13	no
group 2	male	no	yes	39.6	102	120	70	78	6.4	117	1	8900	4.67	14.7	43	1.2	141	4.34	8.9	33	57	25	18	273	0.3	2.42	0	6	160	49	98	163	1.17	14.5	no
group 2	male	no	yes	28	90	120	70	66	6.2	117		7100	5.19	14.9	34	0.77	137	4.5			61	27	18	271	0.3	2.64	0	23	286	41	111	175	1.49	13	no
group 2	female	no	no	27.8	104	110	70	78	6.25	117	3.1	8500	4.74	13.2	27	0.71	131	4.1	9.47		41	21	20	260	0.3	2.63	0	22.2	48	47	83	133		15	grade 1
group 2	male	no	no	36.3	103	120	70	62	6.2	117	0.3	6600	4.65	13.9	21	0.87	138	5.04	9.4	42.5	49	23	19	269	0.3	2.27	0	19	253	47	200	295	2.3	15	grade 1
group 2	female	no	no	24	102				6.5	117	1.3	8900	4.5	13	22	0.51	134	4.92	9.3	40	63	26	17	279	0.3	1.7	0	18.5	219	44	122	171	1.18	14.2	no
group 2	female	yes		29.1	101	120	70	64	6.2	117		8900	4.75	13	16	0.46	133	3.9	9.7	46	57	27	19	269	0.3	2.95	0	12	239	55	175	278	2.96	15	no
group 2	male	no	no	37.2	99	120	70	65	6	126	1	8900	4.53	13.6	53	2.04	136	4.59	9.5	39	59	28	19	269	0.3	3.78	0	12	135	45	159	230	0.82	15.6	grade 1
group 2	male	no	yes	28.1	100	120	70	62	5	117	1	7600	5.07	12.9	16	0.73	139	3.99	9	35	61	26	17	279	0.29	1.56	0	15	320	42	181	263		13.7	grade 1
group 2	female	no	no	27.1	96	130	80	88	6.5	117	2.2	6000	4.13	12.2	27	0.9	139	4.51	9	39	59	25	17	277	0.29	1.23	0	11	125	30	111	166	0.53	14	no
group 2	female	no	yes	27.5	97	130	70	66	5.6	115	3	6200	4.38	12.1	36	0.58	138	4.66	9.5	44	60	29	19	270	0.29	4.86	0	10	83	31	81	154	1.55	14	no
group 2	female	no	no	38.2	95	130	70	62	5	85	4.5	5000	4.35	11.5	22	0.4	138	4.64	8.41	40.5	41	22	20	264	0.28	1.23	0	18	131	45	104	167	1.69	14	no
group 2	female	yes	no	29.3	97	120	60	80	6.5	109	1	8000	4.84	13.3	35	0.57	140	4.65	9		63	32	19	268	0.28	3.84	0	16.7	125	31	107	260	1.7	15.5	no
group 2	male	no	yes	22	101				6.3	117	1	8900	4.34	13	15	1.02	132	4	8.8	45	53	27	19	266	0.28	3.84	0	15.5	254	31	116	197	2.15	15.5	no
group 2	male	no	yes	25	98	120	60	82	6.4	117		7100	4.6	14.2	40	0.71	139	4.38	8.8	37.8	51	28	20	260	0.28	7.78	0	9.4	70	36	122	185	0.77	15.5	grade 1
group 2	female	no	no	29.7	97				6	100	2.6	7800	4.59	13.3	35	1	131	4.57	10.3	42	47	27	20	260	0.27	4.19	0	13	131	40	115	173		14	grade 1
group 2	male	no	no	39.4	97	110	70	84	6.2	109		8900	4.88	12.6	21	1	142	4.28	9.8	45	61	32	19	266	0.27	4.86	0	8	154	48	150	221	0.65	14	no
group 2	female	no	yes	34.6	96				6.2	117	2.1	6800	4.95	14.4	28	0.9	135	4.96			58	40	20	258	0.22	7.16	0	8	144	47	149	216	4.16	15	grade 1
group 2	male	yes		28.4	98	120	70	88	6.5	117		8900	4.81	13.9	27	1	135	4.1	9	42	68	55	21	244	0.21	2.79	0	12.5	106	31	78	157	1.44	15	grade 1
group 2	female	yes	no	27.3	104	120	70	62	6.5	117	1	8900	4.57	13.7	24	0.56	138	4.74	9.4	39	56	44	20	258	0.2	4.65	0	19	139	38	120	175	2.07	17	grade 2-3
group 2	male	no	no	33.9	100	120	70	62	6.5	117	1.2	7400	5.14	14.9	32	0.69	133	4.23	9.4	40.9	56	49	21	242	0.2	7.97	0	8.2	385	45	148	270	1.03	19	grade 1
group 2	female	no	yes	39	103	120	70	62	6.2	125		8400	5.56	15.7	16	0.67	138	4.9			51	44	19	264	0.17	2.79	0	6	218	38	115	197	2.42	15	grade 1
group 2	male	yes	yes	27	102				6.5	117	1.5	5900	4.42	10.6	38	0.63	138	3.88	9.4	29.5	57	49	19	268	0.16	4.53	0	14	43	38	118	176	0.68	16.6	grade 1
group 2	female	no	no	25.7	103				6.5	117	1	4800	3.49	10.4	64	1.13	139	4.47	7.3	28.3	51	55	21	252	0.15	7.78	0	8.1	79	58	107	192	1.05	15.5	grade 1
group 3	male	yes	yes	25	101				8.7	215	2.3	6800	4.3	13	26	0.69	134	4.13	9	36	59	28	27	182	0.63	5.25	0	11	273	24	125	102	2.27	17	grade 2-3
group 3	female	yes	yes	25.9	98	120	70	66	10.3	154	1.6	9200	5.06	15.5	27	0.8	138	4.8	9.4	41	57	35	28	172	0.53	5.94	0	21	169	34	130	212	0.87	15.2	grade 1
group 3	female	no	yes	29	98	110	60	80	10.3	176		5200	4.8	15.6	27	0.45	140	5.14	9.2	35	59	27	25	211	0.52	5.25	0	13	115	38	170	212	0.96	17	grade 2-3
group 3	male	yes	yes	22.2	101	120	60	80	6.06	82		7700	4.86	14.4	30	0.86	138	4.71			69	29	24	222	0.51	5.93	0	19	260	46	126	199		14	no
group 3	male	no	yes	33	102				10.2	196	1.4	6400	4.3	14.3	32	0.81	138	4.38	9.6		66	27	23	231	0.49	4.65	0	23	239	36	127	188	0.84	17	grade 2-3
group 3	male	no	yes	26.1	100	143	60	78	9.8	171		5200	5.06	14.2	26	0.79	142	4.8	9.6		54	28	26	204	0.49	5.25	0	14	151	44	170	212	1.7	14	grade 1
group 3	male	no	yes	26.1	90	120	60	78	9.8	171		5200	4.3	14.2	26	0.79	142	4.8	9.6		58	27	24	217	0.48	5.25	0	14	151	44	170	212	1.7	14	grade 1
group 3	female	yes	yes	35.2	103				8.4	138		5200	4.3	15	24	0.72	140	4.2		45	59	27	24	223	0.47	2.95	0	15.5	375	34	170	203	1.57	15	no
group 3	male	no	no	25.9	90	120	60	78	7.2	159	2.9	7700	4.12	12.7	40	0.87	137	4.96	9	39	55	28	25	215	0.46	5.93	0	18.5	98	52	170	162	3.6	14	no
group 3	male	no	yes	34	103	140	70	82	6.2	106		5200	4.3	16.2	44	0.79	138	4	8.8	42	49	27	26	209	0.45	4.65	0	14	107	49	168	253	2.68	17	grade 2-3
group 3	female	no		22.3	97	137	70	64	8.05	141	3.3	5200	4.38	12	34	0.77	141	4.35			50	27	25	210	0.44	5.75	0	11	94	45	125	212	0.47	12.5	grade 2-3
group 3	male	no	no	25.5	104	143	80	66	8.7	100	2	9000	4.3	15.4	29	0.73	139	4.19	8.8	37.4	49	27	25	216	0.42	3.78	0	15.5	112	42	132	195	1.83	15.6	grade 1
group 3	female	no	yes	29.6	100	120	60	80	9.6	202	1.6	5200	4.94	15.6	33	0.79	137	5.6	10	43	59	27	27	281	0.42	5.21	0	10	367	35	170	221	0.7	17	grade 1
group 3	male	no	yes	29.4	101	120	60	78	7.9	159	1	8900	4.78	13.2	31	0.8	137	4.23	9.4	40	69	32	24	282	0.37	5.25	0	16	275	34	126	212	2.07	17	grade 2-3
group 3	female	yes	no	31.1	90	130	70	64	7.7	177		9200	4.49	12.4	29	0.5	136	4.67	9.9		52	49	27	182	0.31	7.94	0	24	535	41	125	205	1.18	16	grade 1
group 3	male	no	no	26.3	98				11.3	328	2.5	7400	4.8	14.4	21	0.65	134	4.77	9.1		61	40	23	225	0.31	5.25	0	13	186	42	158	232	4.83	14	grade 1
group 3	female	no		22.3	97	120	70	64	8.05	141	3.3	5200	4.38	12	34	0.77	141	4.35			66	49	24	222	0.29	5.75	0	6	94	45	170	212	0.47	12.5	grade 2-3
group 3	male	no	yes	29.6	104	145	60	80	9.6	202	1.6	5200	4.94	15.6	33	0.79	137	5.6	10	43	44	32	27	279	0.27	5.21	0	8	367	35	170	221	0.7	17	grade 1
group 3	male	no	yes	25.9		140	70	66	10.3	154	1.6	5200	4.3	15.5	27	0.8	138	4.8	9.4	41	60	47	23	226	0.26	5.94	0	6	169	34	170	212	0.87	15.2	grade 1
group 3	female	no	no	34.7	98				6.5	117	2.2	5200	4.2	11.1	43	1.18	142	4.65	9.2	40	63	49	23	229	0.26	3.78	0	16.7	111	39	170	212	2.42	15.6	grade 1
group 3	female	no	no	26.8	99				7.9	126		5200	4.24	12.5	32	0.87	137	4.7	8.9	45	41	46	27	202	0.24	4.53	0	13	196	35	148	202	4.7	16.6	grade 1
group 3	female	no	yes	34	100	110	70	82	6.2	106		5200	5.84	16.2	44	0.79	138	4	8.8	42	41	36	27	264	0.23	4.65	0	19	107	49	168	253	2.68	17	grade 2-3
group 3	female	yes	no	27.9	99	120	80	82	7.6	115	2.7	7900	4.42	12.1	26	0.59	138	4.42	9.8	40.6	41	37	27	269	0.22	5.21	0	11	147	43	110	171	6.6	17	grade 1
group 3	male	no	yes	23	102				11.6	229	1	8900	4.9	15.5	20	0.45	137	4.8	9.4	40	52	70	24	219	0.16	5.75	0	15	183	34	143	206	2.09	12.5	grade 2-3
group 3	female	no	yes	29	98		60	80	10.3	176		5200	4.8	15.6	27	0.45	140	5.14	9.2	35	60	74	23	228	0.16	5.25	0	11	115	38	126	212	0.96	17	grade 2-3
group 2	male	no	no	30	97	120	70	62	5.9	117	1	7500	5.1	13.8	27	0.7	138	4.94	9.7	44.7	71	27	66	255	1.36	8	1	33	191	43	140	222	2.6	14	no
group 2	female	no	no	27.6	101	120	70	82	6.6	117	2.64	7400	4.45	13.5	31	1	139	4.15	9.02	42	71	27	66	255	1.36	8	1	24	117	31	107	258	1.1	13	no
group 2	male	no	yes	27.5	100				6.5	117	0.2	8900	5.7	14	30	0.8	130	4.56	9		71	27	66	255	1.36	8.8	1	23	64		72		2	14	no
group 2	male	no	yes	29.7	99	120	80	82	6.5	117	2	9100	4.73	14.4	34	0.67	139	4.2	9.4		71	27	66	255	1.36	8.1	1	15.5	76	54	56	113	1.29	14	grade 1
group 2	male	no	yes	27	90				6.2	117	1.5	8900	4.6	13.4	24	0.54	136	3.71	8.7		71	27	66	255	1.36	8.5	1	11.5	193	26	68	108	0.99	13	grade 1
group 2	female	no	no	41.6	103				6.1	117	1	4600	4.06	13.1	24	0.67	137	4.38	8.9		71	27	66	255	1.36	8.8	1	11	131		212		4.4	15.2	grade 1
group 2	male	yes	no	30	99	120	70	76	6.5	117	1	9000	4.7	13.4	57	0.79	139	4.36	9.7	40.3	71	27	66	255	1.36	8.9	1	35	101	31	107	234	2.07	14.6	grade 2-3
group 2	male	no	yes	28.6	104	120	60	80	6	115	1	8600	4.91	14.1	41	0.86	141	5.17	9.9	31	68	19	21	242	0.62	9.64	1	11	187	34	135	215	3.6	18	grade 2-3
group 2	female	no	no	31.2	100	120	80	84	6.2	117		7800	4.29	12.9	30	1	139	4.62			61	32	22	238	0.35	9.64	1	11.5	209	31	149	237	0.86	18	grade 2-3
group 2	female	no	yes	25	98	120	70	66	6.2	117	1	8200	5.02	14.3	19	0.85	135	3.92	8.3	36	63	28	20	258	0.35	8.15	1	35	175	36	121	192	1.97	17	grade 1
group 2	male	yes	yes	26	101	160	90	66	6.36	123	1	8900	4.21	13	31	0.88	138	4.13	9.4	46	69	36	21	251	0.32	9	1	33	153	32	90	140	1.93	17	grade 2-3
group 2	male	yes	yes	32.4	90	120	70	66	6	117		4900	5.62	16	34	0.99	141	4.92	10.3	55	52	27	21	250	0.32	8.2	1	35	215		164		4	15	grade 2-3
group 2	female	no	no	29.1	101				6.5	108		9200	4.62	12.2	17	0.55	141	4.5	9.2		70	40	21	250	0.29	9.64	1	35	143	28	118	190	0.95	18	grade 2-3
group 3	male	yes	yes	29.4	97	110	70	78	11.1	253	3.2	8900	5.24	14.2	28	1.04	140	4.29	9.4	43	62	27	44	114	1.77	8	1	13	66	37	170	212	1.38	13.7	grade 1
group 3	male	yes	yes	27.3	102	120	60	80	9.3	305		5700	5.05	15.4	18	0.95	137	4.91	10.2	48	52	27	49	111	1.7	8.62	1	11	134	39	138	130	1	14	grade 2-3
group 3	male	no	yes	35	103	145			6.3	103	3.5	5000	4.08	12.8	34	0.6	140	4.31	9.3	42	71	27	43	141	1.6	9	1	17	132	39	160	162	4.05	19	no
group 3	male	yes	yes	28	101				11.2	236	1	8900	4	11.1	47	2.6	134	4.75	9.5	34.7	60	55	55	78	1.54	8	1	14	82	48	170	212	1.12	14.2	no
group 3	female	yes	no	25	97					123	1	7400	3.29	10	64	1.09	142	4.28	9.3	30.3	63	35	65	159	1.47	9.56	1	33	106	38	170	212	1.99	15	grade 1
group 3	female	no	yes	35.4	104	110	65	64	5.6	140	1	7700	4.3	12.6	21	0.58	138	4.2	8.9	38	72	36	55	155	1.42	8	1	18	207	58	142	225	0.7	12.5	grade 2-3
group 3	female	yes	no	34.7	97				6.5	117	2.2	5200	4.2	11.1	43	1.18	142	4.65	9.2	40	59	55	66	100	1.42	9	1	14	111	39	126	212	2.42	15.6	grade 1
group 3	male	no	yes	35.2	103				8.4	138		7600	4.3	15	24	0.72	140	4.2		45	63	40	49	111	1.39	8	1	23	375	34	125	203	1.57	15	no
group 3	male	yes	yes	29	97	120	80	78	7.8	163	3.2	8900	4.3	15.3	19	0.89	140	3.8	11.2	40	62	44	88	180	1.38	8.1	1	21	215	34	170	142		16	grade 1
group 3	female	yes	no	25	99	110	70	62	6.7	150	1	9200	4.64	12.6	21	0.53	141	3.52	9.9		57	41	71	145	1.36	9.56	1	31	190	40	170	178	2.91	15	grade 1
group 3	male	no	yes	27	97				8.3	183	3.8	8900	4.3	12.4	43	1.06	133	4.77	8.8	37.5	71	27	66	255	1.36	8	1	22.2	225	35	142	209	2.4	15.2	grade 1
group 3	male	no	yes	27	102				6.9	132		8100	4.61	13	30	1.07	138	4.3	9.3	42.6	71	27	66	255	1.36	8	1	17	126	43	135	199	2.03	14	grade 1
group 3	male	no	no	26.8	102	137			7.9	126		8900	4.24	12.5	32	0.87	137	4.7	8.9	45	71	27	66	255	1.36	8.2	1	14	196	35	148	202	4.7	16.6	grade 1
group 3	male	no	yes	30	98				9.1	258		8900	4.97	14.4	19	0.82	140	4.98			71	27	66	255	1.36	8.2	1	14	106	29	115	164	2.83	15	grade 2-3
group 3	female	yes	no	31.2	103				10.4	317		9000	4.3	10.9	37	0.63	135	4.68	9.3	43.9	71	27	66	255	1.36	8.62	1	11	323	42	170	186	2.37	14	grade 2-3
group 3	female	yes	no	25.8	101	110	70	62	5.7	126	0.7	5200	4.3	16.9	25	0.74	138	4.32	9.5		71	27	66	255	1.36	8.2	1	33	133	50	170	192	0.91	15	grade 2-3
group 3	male	no	yes	26	97	143			10.9	324	2.9	5200	4.87	13.8	37	0.71	137	4.19	9.1	37	63	28	44	155	1.28	9	1	13	338		168	212		15	grade 1
group 3	male	no	no	30.3	100				6.4	72		8600	4.3	14.9	12	0.81	142	5.23	9	37.2	63	35	35	166	0.76	8	1	15.5	165	47	128	134	0.86	15	no
group 3	male	no	no	32.4	100				7.8	182	3.5	5200	5.38	14.3	32	1.03	140	5.05	8.4	39	57	40	40	157	0.73	8	1	24	343	19	135	212	1.1	14.5	no
group 3	male	no	no	30.7	99	120	70	90	6.9	98		9200	4.3	14.7	32	0.74	136	4.45			56	32	32	167	0.67	9	1	16	226	27	136	140	1.51	16.6	grade 1
group 3	female	yes	yes	27.3	99	120	60	88	8.6	171	1.1	8900	4.3	10.8	41	0.77	137	4.68	9.6	47	63	27	27	199	0.63	8.15	1	19	283	32	170	229	3.13	17	grade 1
group 3	female	no	no	29.3	97	137			5.5	87	1	5200	4.73	14.7	33	0.51	133	4.14	9.2	39.5	68	32	27	192	0.6	9	1	14	41	38	170	212	2.3	19	no
group 3	male	no	no	23	97	140			15.9	328	1.8	8900	4.3	11.9	45	1.23	131	4.61			59	29	27	187	0.59	8	1	16.7	122	36	170	212	1.31	13.7	grade 1
group 3	female	no	no	26.1	97	140	70	78	9.9	241		8900	4.99	14.1	28	0.61	137	4.83	9.6		57	32	28	173	0.58	8	1	16.7	224	41	143	212	1.26	14.5	no
group 3	male	no	yes	27.3	99	145	60	88	8.6	171	1.1	8900	4.3	10.8	41	0.77	137	4.68	9.6	47	57	27	27	195	0.58	8.15	1	14	283	32	170	229	3.13	17	grade 1
group 3	male	no	yes	31		145			6.4	139	2.64	4500	4.3	12.9	39	0.86	141	4.9		47	44	36	36	161	0.55	8	1	35	193	52	141	212	1.26	14.2	no
group 3	female	no	yes	25.7	104	137	70	76	5.8	121	1	8900	4.75	13.9	46	0.91	141	4.85	9.5	31	68	27	27	264	0.52	8.15	1	23	153	39	180	166	4.19	17	grade 1
group 3	female	no	yes	27.3	90				9.1	296	1	9200	5.42	15.3	28	0.67	135	4	9.5	41.3	54	37	29	170	0.5	8	1	15.5	83	35	155	158	3.58	15	grade 1
group 3	male	yes	yes	31	104	145			6.4	139	2.64	4500	4.3	12.9	39	0.86	141	4.9		47	54	27	27	282	0.38	8	1	33	193	52	141	212	1.26	14.2	no
group 3	male	no	yes	26	100	143			10.9	324	2.9	7700	4.87	13.8	37	0.71	137	4.19	9.1	37	63	35	26	260	0.36	8	1	12.5	338		168	212		15	grade 1
group 3	male	no	no	23	97	140			15.9	328	1.8	5200	4.3	11.9	45	1.23	131	4.61			64	55	27	187	0.34	8	1	31	122	36	170	212	1.31	13.7	grade 1
group 3	female	yes	no	29.3	101	137			5.5	87	1	9200	4.73	14.7	33	0.51	133	4.14	9.2	39.5	66	41	25	273	0.29	8	1	12.5	41	38	127	212	2.3	19	no
group 3	male	no	no	25.8	90	143	70	62	5.7	126	0.7	8900	4.3	16.9	25	0.74	138	4.32	9.5		64	44	27	270	0.29	8.2	1	35	133	50	114	192	0.91	15	grade 2-3
group 3	male	no	yes	28.5	104	110	70	78	6.8	182		6200	4.55	12.8	54	0.9	133	4.8	10	42	56	44	24	222	0.28	8.1	1	14	103	43	204	273	1.4	17	grade 1
group 3	male	yes	no	32.4	90				7.8	182	3.5	8800	5.38	14.3	32	1.03	140	5.05	8.4	39	61	55	26	277	0.21	8	1	12	343	19	135	212	1.1	14.5	no
